# Supplementary material
Source: PubMed Central journal article supplement (PMC6482063)
Supplement: NIHMS1523649-supplement-1.pdf [file NIHMS1523649-supplement-1.pdf]

**A**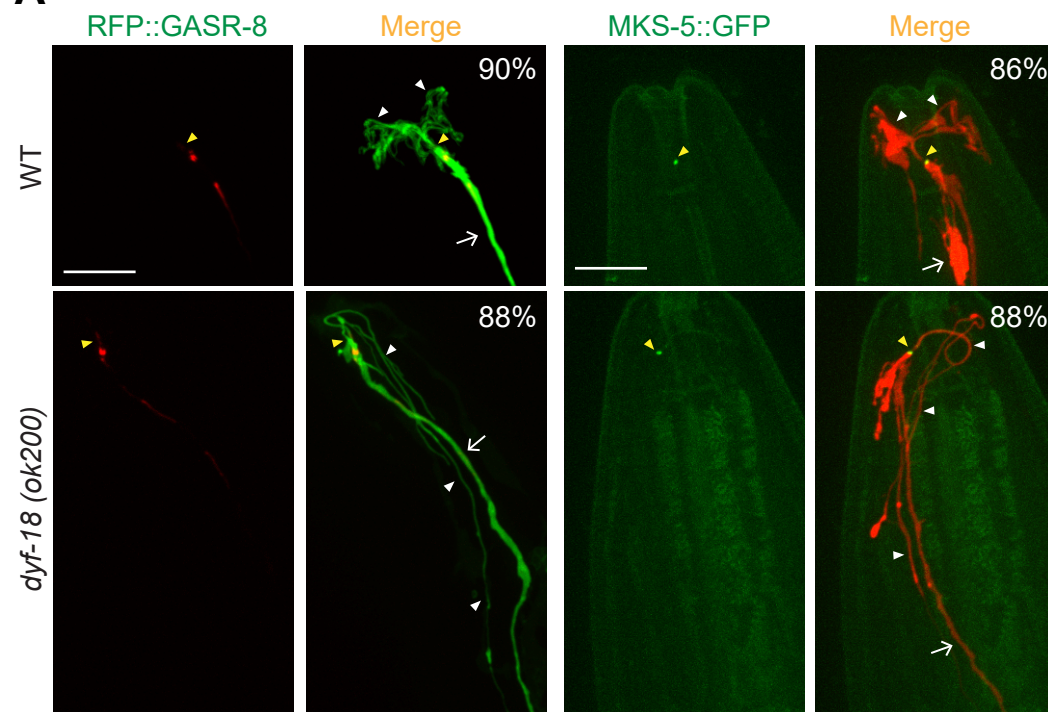**B**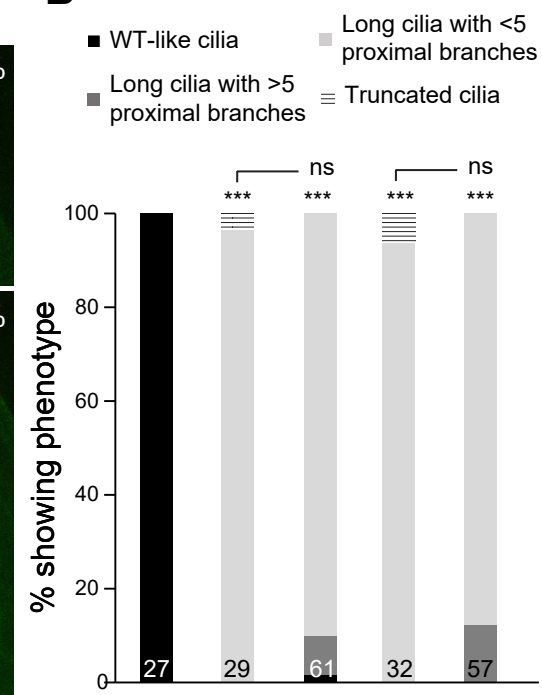

| Genotype | WT | <i>dyf-18(oy153)</i>      | <i>dyf-18(ok200)</i>      |
|----------|----|---------------------------|---------------------------|
| Promoter | -  | -                         | <i>bbs-8</i>              |
| cDNA     | -  | <i>dyf-18(oy153)::gfp</i> | <i>dyf-18(oy153)::gfp</i> |

**C**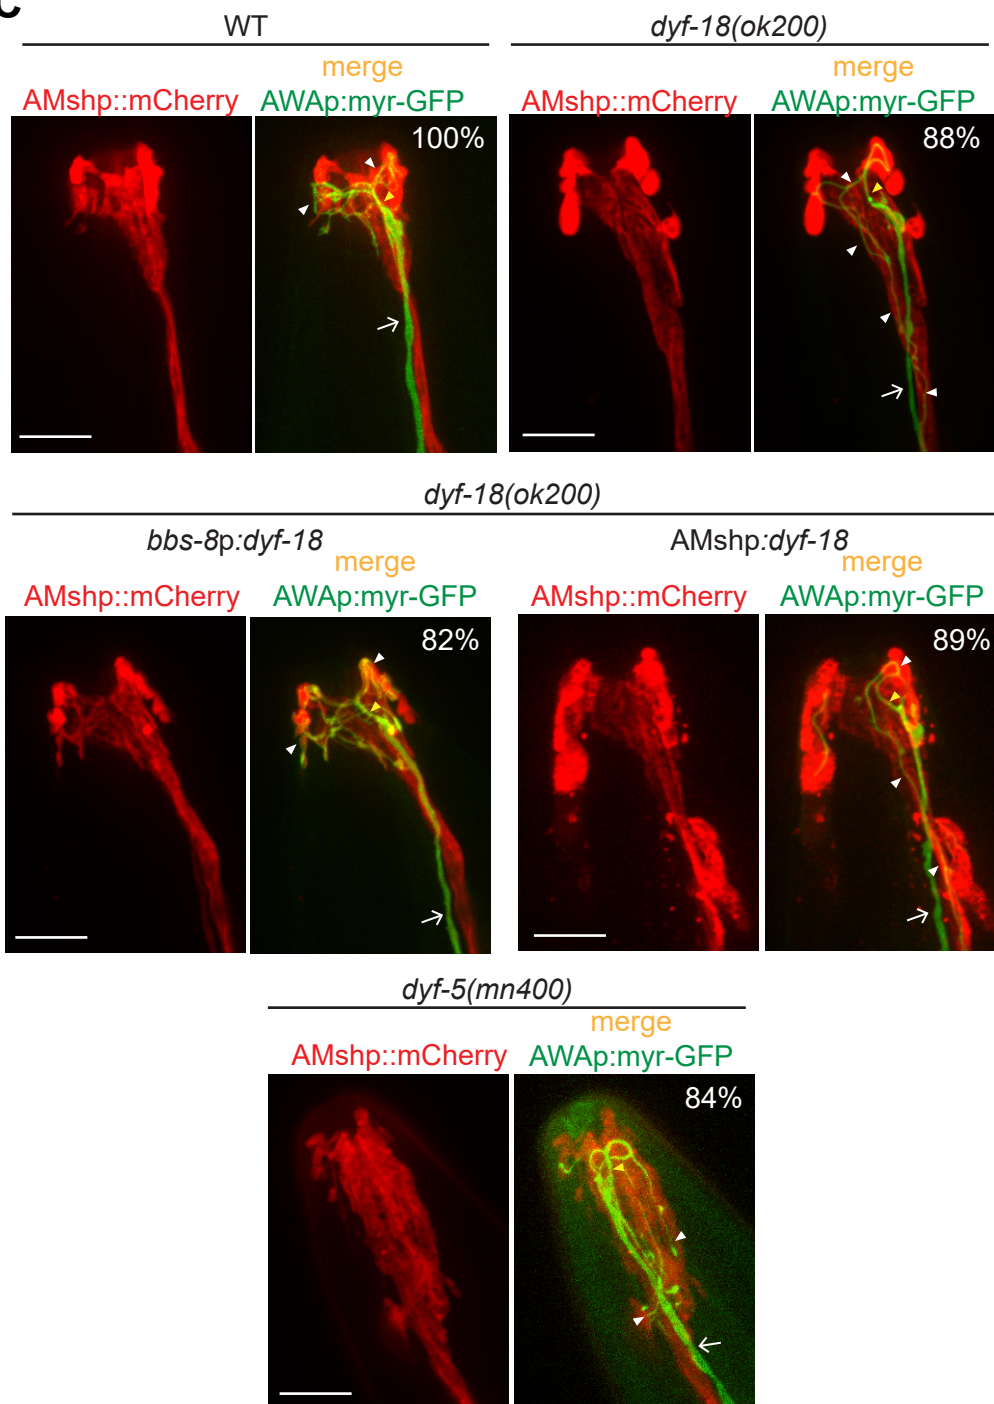**D**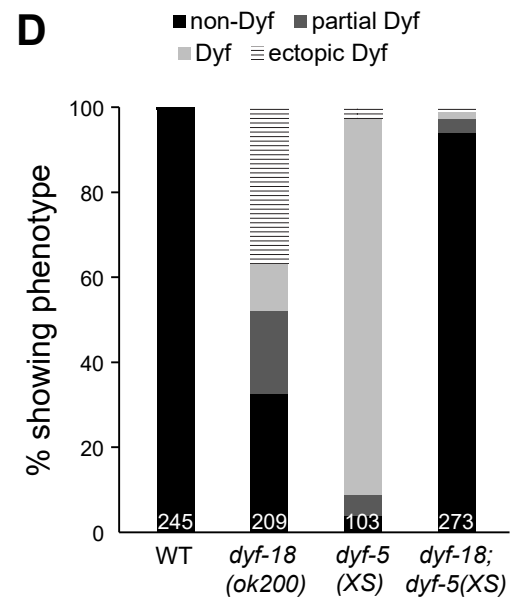

**Figure S1. DYF-18 acts neuronally to regulate AWA cilia morphology.** Related to Figure 1 and Figure 2.

**A)** Representative images of AWA expressing the indicated fusion proteins in wild-type and *dyf-18(ok200)* animals. Cilia were visualized via expression of *gpa-4Δ6p::myr-gfp* or *gpa-4Δ6p::mCherry*. Numbers at top right indicate the percentage of neurons exhibiting the shown phenotypes;  $n \geq 30$  neurons each in 3 independent experiments. The cilia base and cilia are indicated by yellow and white arrowheads, respectively; the dendrite is marked by an arrow. Anterior is at top in all images. Scale bars: 10  $\mu$ m.

**B)** Percentage of adult hermaphrodites of the indicated genotypes exhibiting AWA cilia phenotypes. Numbers in each bar indicate the number of examined neurons in 2-3 independent experiments. \*\*\* indicates different from wild-type at  $P < 0.001$ ; ns – not significant (Wilcoxon rank-sum test).

**C)** Representative images of AWA (green) and the amphid sheath cell (red) in adult hermaphrodites of the indicated genotypes. AWA was visualized via expression of *gpa-4Δ6p::myr-gfp*, the amphid sheath cell was visualized via expression of *F16F9.3p::mCherry* (gift of Shai Shaham) [S1]. Wild-type *dyf-18* sequences were expressed in ciliated neurons or the amphid sheath cell under the *bbs-8* and *F16F9.3* promoters, respectively. Numbers at top right indicate the percentage of neurons exhibiting the shown phenotypes;  $n \geq 30$  neurons each in 3 independent experiments. The cilia base and cilia are indicated by yellow and white arrowheads, respectively; the dendrite is marked by an arrow. Anterior is at top in all images. Scale bars: 10  $\mu$ m.

**D)** Percentages of neurons in adult hermaphrodites of the indicated genotypes exhibiting dye-filling phenotypes. Numbers in each bar indicate the number of examined animals in

2 independent experiments. Non-Dyf – dye uptake in 12 pairs of amphid sensory neurons; partial Dyf – dye uptake in <12 pairs of amphid sensory neurons; Dyf – no dye uptake in amphid sensory neurons; ectopic Dyf – dye uptake in additional sensory neurons.

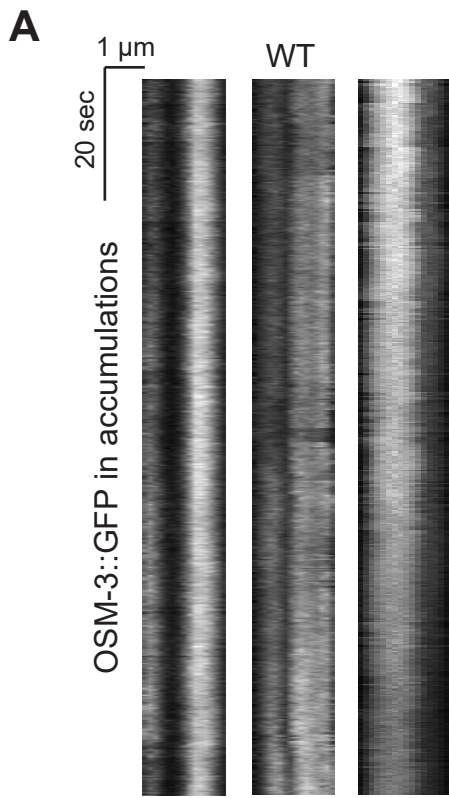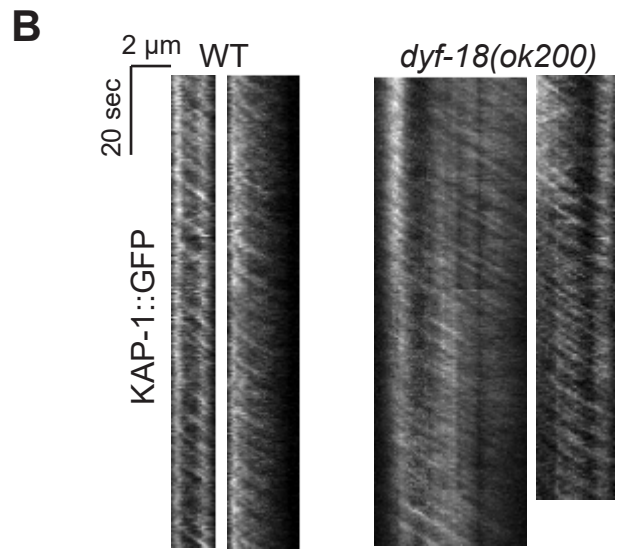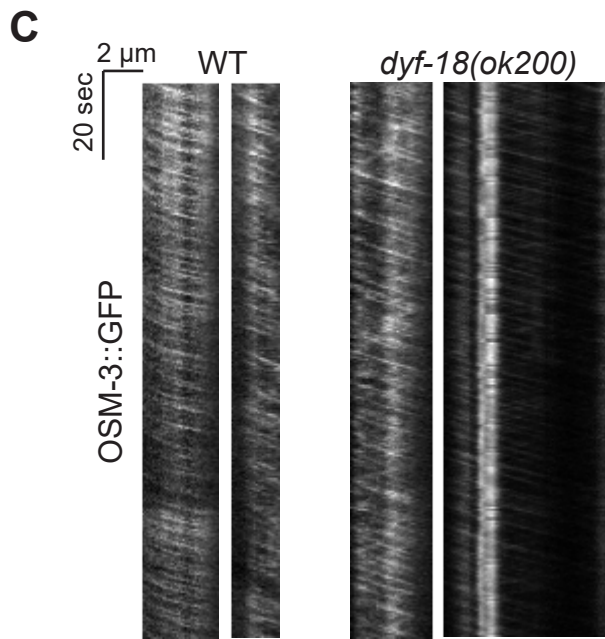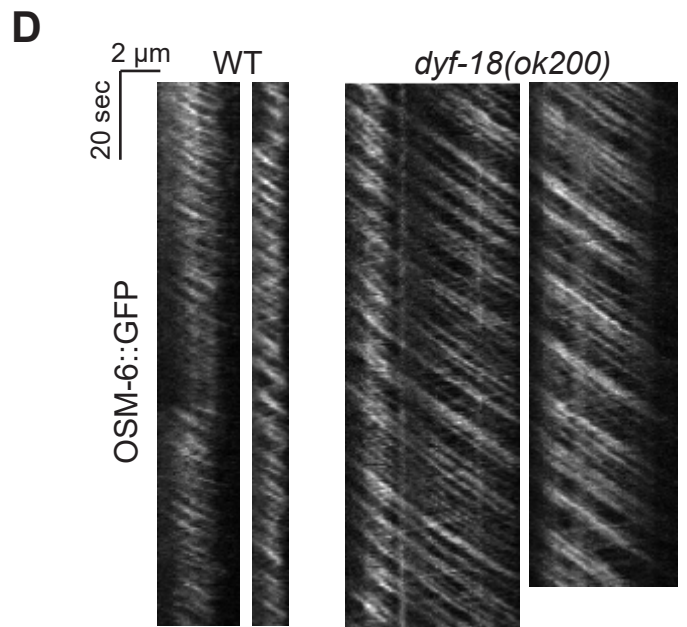

**Figure S2. Localization and movement of IFT motors in AWA cilia.** Related to Figure 4.

**A)** Representative kymographs of immobile OSM-3::GFP at the distal tips of wild-type AWA cilia. Three independent examples are shown.

**B-D)** Representative kymographs of KAP-1:GFP (B), OSM-3::GFP (C) and OSM-6::GFP (D) movement in the proximal stalks of AWA cilia in wild-type and *dyf-18(ok200)* mutants. Two independent examples are shown for each.

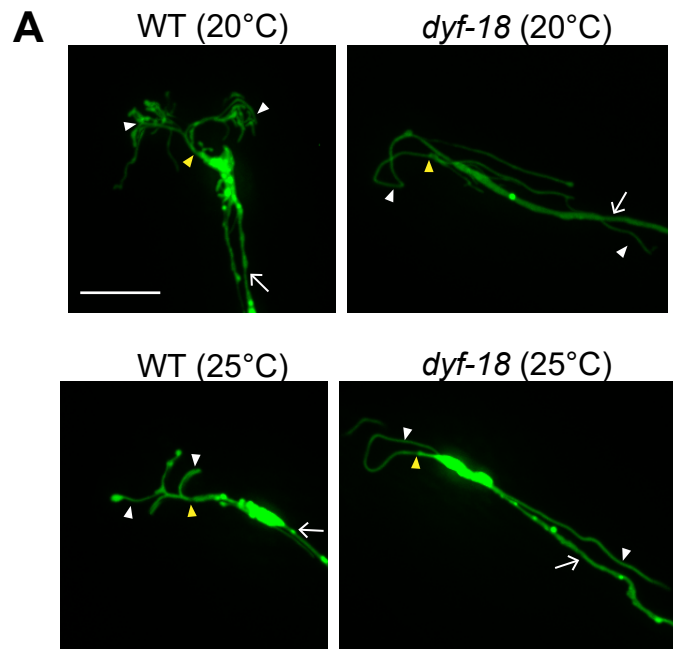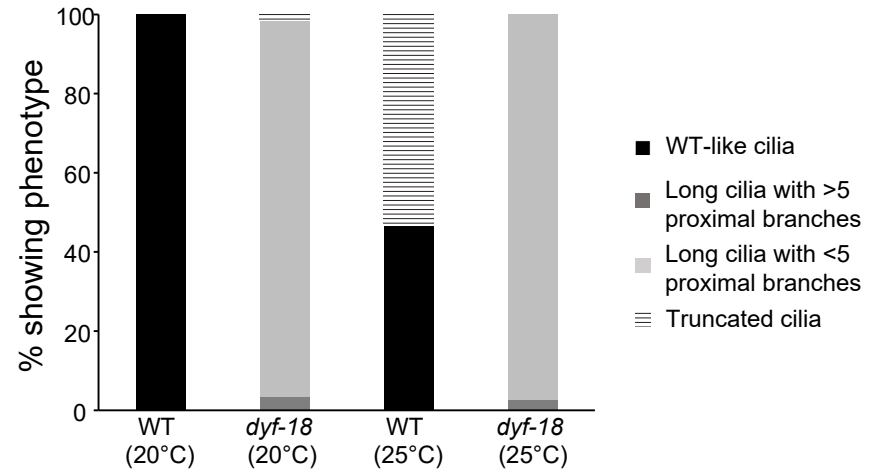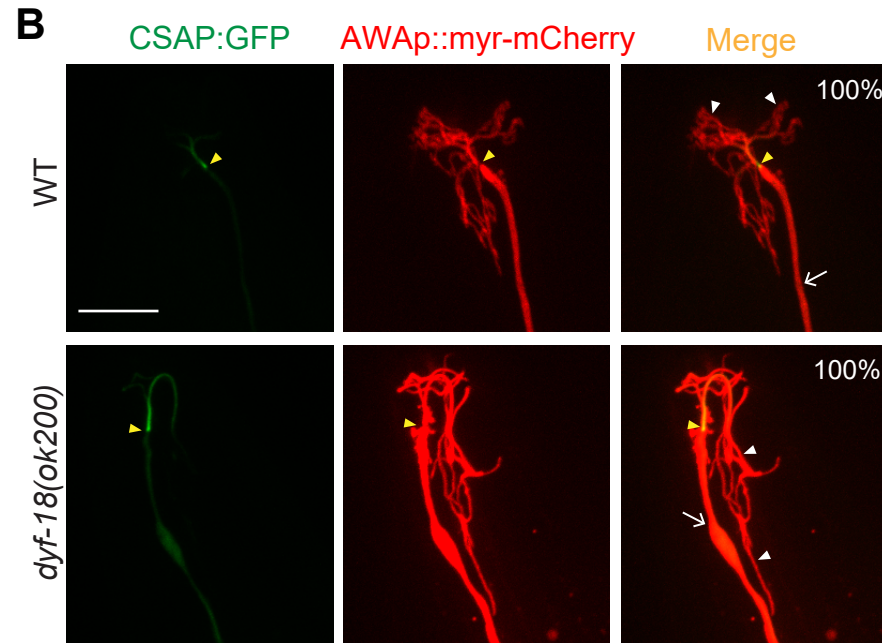

**Figure S3. AWA axonemal stability is altered in *dyf-18* mutants.** Related to Figure 5 and Figure 6.

**A)** Representative images (left) and quantification of AWA cilia morphologies (right) in wild-type and *dyf-18(ok200)* mutant animals grown at 20°C and 25°C. The cilia base and cilia are indicated by yellow and white arrowheads, respectively; the dendrite is marked by an arrow in images at left.  $n \geq 30$  neurons. Anterior is at left. Scale bar: 10  $\mu\text{m}$ .

**B)** Representative images of the localization of the polyglutamylated tubulin binding protein CSAP [S2] in wild-type and *dyf-18(ok200)* mutants. The cilia base and cilia are indicated by yellow and white arrowheads, respectively; the dendrite is marked by an arrow. Numbers at top right indicate the percentage of neurons exhibiting the shown phenotypes;  $n \geq 30$  in 3 independent experiments. Scale bar: 10  $\mu\text{m}$ .

**A**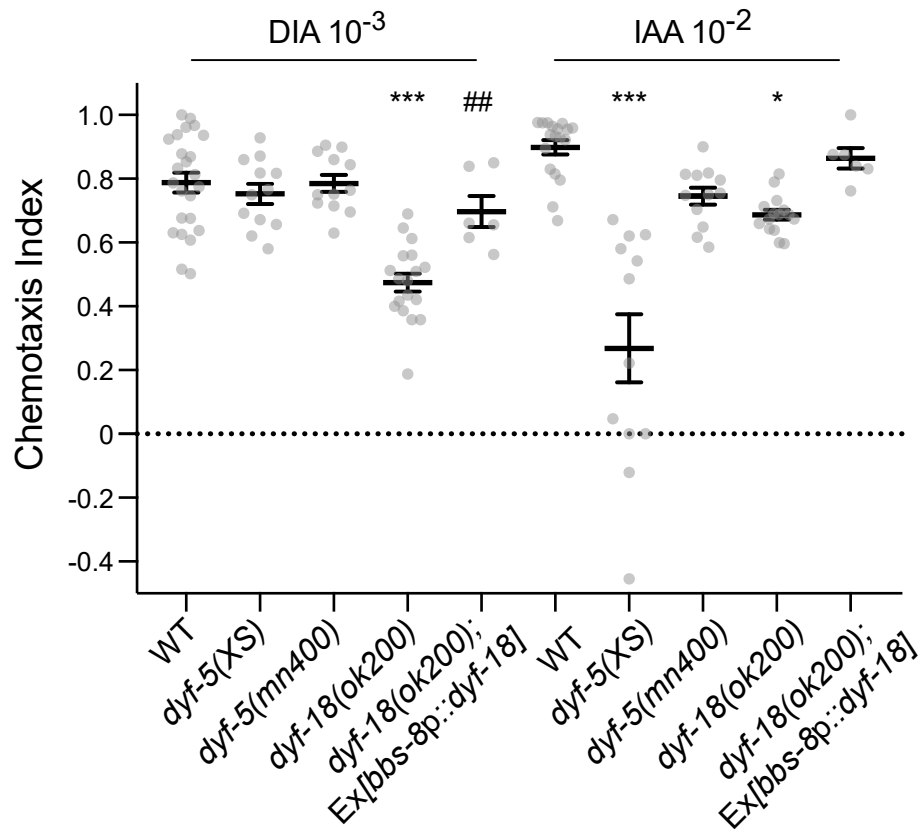**B**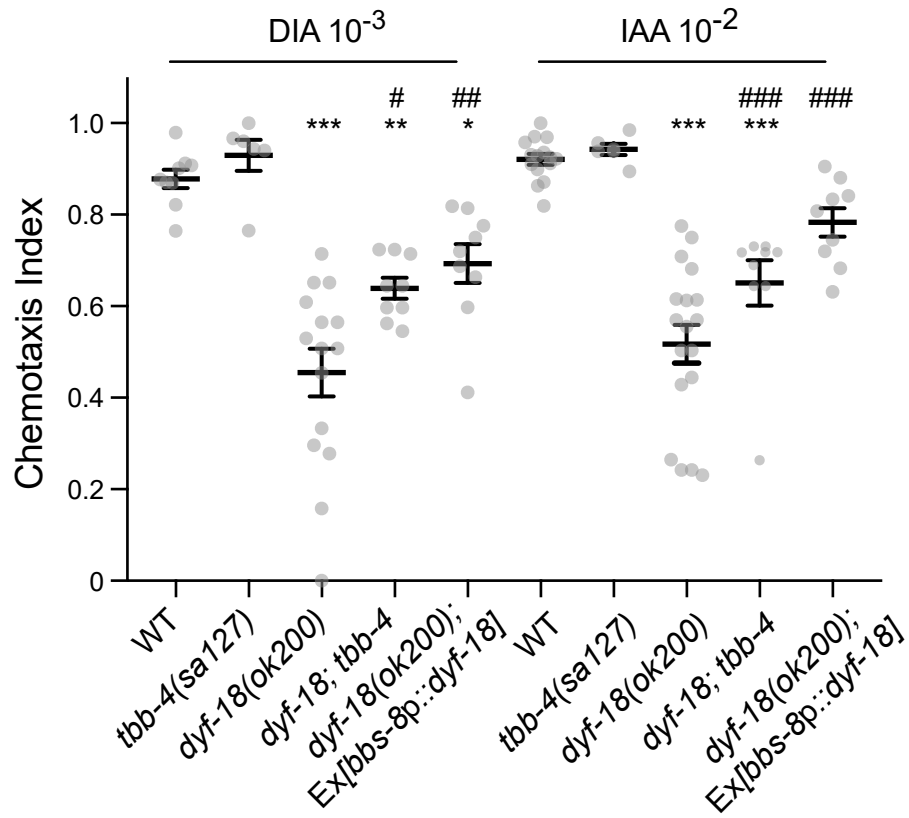



**Figure S4. Sensory behavioral phenotypes of *dyf-5* and *dyf-18* mutants.** Related to Figure 6.

**A, B)** Behavioral responses of adult animals of the indicated genotypes to a point source of diacetyl (DIA) diluted to  $10^{-3}$  and isoamyl alcohol (IAA) diluted to  $10^{-2}$ . Chemotaxis index = (number of animals in plate segments containing the odor) – (number of animals in plate segments containing ethanol)/total number of animals. Horizontal bar indicates mean, errors are SEM. Each dot is the chemotaxis index of a single assay with ~100 animals; assays were performed at least in triplicate on three independent days. \*, \*\*, and \*\*\* indicate different from wild-type at  $P < 0.05$ , 0.01, and 0.001, respectively; #, ## and ### indicate different from *dyf-18(ok200)* at  $P < 0.05$ , 0.01 and 0.001, respectively (ANOVA with Tukey's posthoc corrections). Animals in A and B were grown at 20°C and 15°C, respectively.

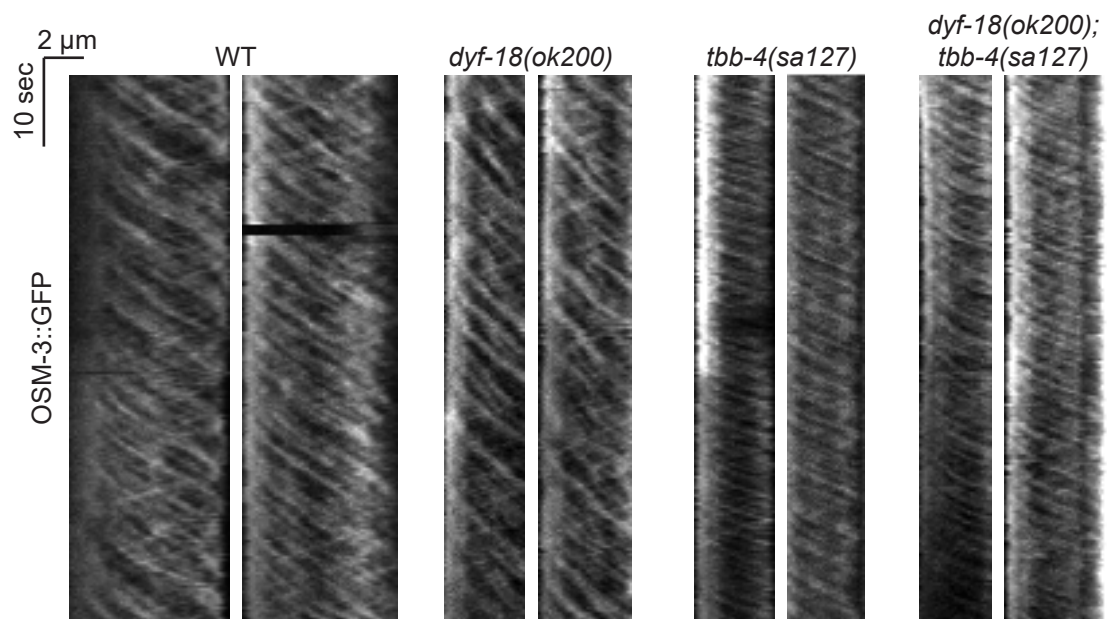

**Figure S5. Movement of OSM-3::GFP in ASH cilia.** Related to Figure 7.

Shown are two representative kymographs each for OSM-3::GFP movement in the ASH cilia of animals of the indicated genotypes. Velocities shown in Table S3 were calculated from the first halves of the kymographs in wild-type, *dyf-18* and *dyf-18; tbb-4* double mutants (middle segments).

**Table S1. Anterograde IFT velocities in AWA cilia.** Related to Figure 4.

| Strain               | Fusion protein <sup>a</sup> | Mean anterograde velocity<br>( $\mu\text{m}/\text{sec} \pm \text{SD}$ ) <sup>b</sup> | n/N    |
|----------------------|-----------------------------|--------------------------------------------------------------------------------------|--------|
| Wild-type            | KAP-1::GFP                  | $0.66 \pm 0.15$                                                                      | 322/16 |
| <i>dyf-18(ok200)</i> | KAP-1::GFP                  | $0.70 \pm 0.12$                                                                      | 609/27 |
| Wild-type            | OSM-3::GFP                  | $1.34 \pm 0.43$                                                                      | 742/17 |
| <i>dyf-18(ok200)</i> | OSM-3::GFP                  | $1.30 \pm 0.37$                                                                      | 425/16 |
| Wild-type            | OSM-6::GFP                  | $0.72 \pm 0.25$                                                                      | 701/27 |
| <i>dyf-18(ok200)</i> | OSM-6::GFP                  | $0.90 \pm 0.52^{\text{c}}$                                                           | 745/15 |

<sup>a</sup>All fusion proteins were expressed under the *gpa-416* promoter.

<sup>b</sup>IFT was quantified in the proximal stalk of wild-type cilia, and in a region approximately 7  $\mu\text{m}$  from the cilia base in *dyf-18* mutants.

<sup>c</sup>Different from wild-type at  $P < 0.001$ .

All analyses were performed in one day old adult hermaphrodites grown at 20°C. n: number of GFP particles; N: number of cilia.

Also see Figure S2B-D.

**Table S2. AWA cilia morphology in animals mutant for tubulin post-translational modification genes.** Related to Figure 6.

| Genotype                                 | Percentage of neurons exhibiting phenotype: |           |           | n  | References |
|------------------------------------------|---------------------------------------------|-----------|-----------|----|------------|
|                                          | Wild-type                                   | Elongated | Truncated |    |            |
| <i>atat-2(ok2415)</i>                    | 92.6                                        | 0.0       | 7.4       | 27 | [S3]       |
| <i>dyf-18(ok200);<br/>atat-2(ok2415)</i> | 0.0                                         | 89.7      | 10.3      | 29 |            |
| <i>ccpp-1(ok1821)</i>                    | 89.7                                        | 0.0       | 10.3      | 29 | [S4]       |
| <i>ccpp-1(ok1821);<br/>dyf-18(ok200)</i> | 7.4                                         | 85.2      | 7.4       | 27 |            |
| <i>klp-13(oy154)</i>                     | 96.2                                        | 0.0       | 3.8       | 26 | [S5]       |
| <i>dyf-18(ok200);<br/>klp-13(oy154)</i>  | 0.0                                         | 95.2      | 4.8       | 21 |            |
| <i>ccpp-6(ok382)</i>                     | 91.3                                        | 0.0       | 8.7       | 23 | [S6]       |
| <i>ccpp-6(ok382);<br/>dyf-18(ok200)</i>  | 5.7                                         | 88.6      | 5.7       | 35 |            |
| <i>ttll-4(tm3310)</i>                    | 95.7                                        | 0.0       | 4.3       | 23 | [S4, S6]   |
| <i>ttll-4(tm3310);<br/>dyf-18(ok200)</i> | 4.0                                         | 92.0      | 4.0       | 25 |            |
| <i>mec-17(ok2109)</i>                    | 96.7                                        | 0.0       | 3.3       | 30 | [S7]       |

**Table S3. Anterograde OSM-3::GFP velocities in the middle segments of ASH cilia.**  
Related to Figure 7.

| Strain expressing OSM-3::GFP <sup>a</sup> | Mean anterograde velocity<br>( $\mu\text{m}/\text{sec} \pm \text{SD}$ ) <sup>b</sup> | n/N    |
|-------------------------------------------|--------------------------------------------------------------------------------------|--------|
| Wild-type                                 | $0.63 \pm 0.18$                                                                      | 866/31 |
| <i>dyf-18(ok200)</i>                      | $0.46 \pm 0.15^c$                                                                    | 670/43 |
| <i>tbb-4(sa127)</i>                       | $0.95 \pm 0.29^c$                                                                    | 811/40 |
| <i>dyf-18(ok200); tbb-4(sa127)</i>        | $0.75 \pm 0.28^{d,e}$                                                                | 864/41 |

<sup>a</sup>OSM-3::GFP was expressed under the *sra-6* promoter.

<sup>b</sup>IFT velocities were quantified in the middle segments of ASH cilia.

<sup>c</sup>Different from wild-type at  $P < 0.001$ .

<sup>d</sup>Different from *dyf-18* at  $P < 0.001$ .

<sup>e</sup>Different from *tbb-4* at  $P < 0.001$ .

All analyses were performed in one day old adult hermaphrodites grown at 15°C. n: number of GFP particles; N: number of cilia.

Also see Figure S5.

## Supplemental References

- S1. Bacaj, T., Tevlin, M., Lu, Y., and Shaham, S. (2008). Glia are essential for sensory organ function in *C. elegans*. *Science* 322, 744-747.
- S2. Backer, C.B., Gutzman, J.H., Pearson, C.G., and Cheeseman, I.M. (2012). CSAP localizes to polyglutamylated microtubules and promotes proper cilia function and zebrafish development. *Mol Biol Cell* 23, 2122-2130.
- S3. Shida, T., Cueva, J.G., Xu, Z., Goodman, M.B., and Nachury, M.V. (2010). The major alpha-tubulin K40 acetyltransferase alphaTAT1 promotes rapid ciliogenesis and efficient mechanosensation. *Proc Natl Acad Sci USA* 107, 21517-21522.
- S4. O'Hagan, R., Piasecki, B.P., Silva, M., Phirke, P., Nguyen, K.C., Hall, D.H., Swoboda, P., and Barr, M.M. (2011). The tubulin deglutamylase CCPP-1 regulates the function and stability of sensory cilia in *C. elegans*. *Curr Biol* 21, 1685-1694.
- S5. Niwa, S., Nakajima, K., Miki, H., Minato, Y., Wang, D., and Hirokawa, N. (2012). KIF19A is a microtubule-depolymerizing kinesin for ciliary length control. *Dev Cell* 23, 1167-1175.
- S6. Kimura, Y., Kurabe, N., Ikegami, K., Tsutsumi, K., Konishi, Y., Kaplan, O.I., Kunitomo, H., Iino, Y., Blacque, O.E., and Setou, M. (2010). Identification of tubulin deglutamylase among *Caenorhabditis elegans* and mammalian cytosolic carboxypeptidases (CCPs). *J Biol Chem* 285, 22936-22941.
- S7. Akella, J.S., Wloga, D., Kim, J., Starostina, N.G., Lyons-Abbott, S., Morrissette, N.S., Dougan, S.T., Kipreos, E.T., and Gaertig, J. (2010). MEC-17 is an alpha-tubulin acetyltransferase. *Nature* 467, 218-222.
